# Supplementary material
Source: Springer Nature journal article supplement (https://www.springermedizin.de/resource/supplementary/12990_2013_720_MOESM6_ESM.pdf/9612244)

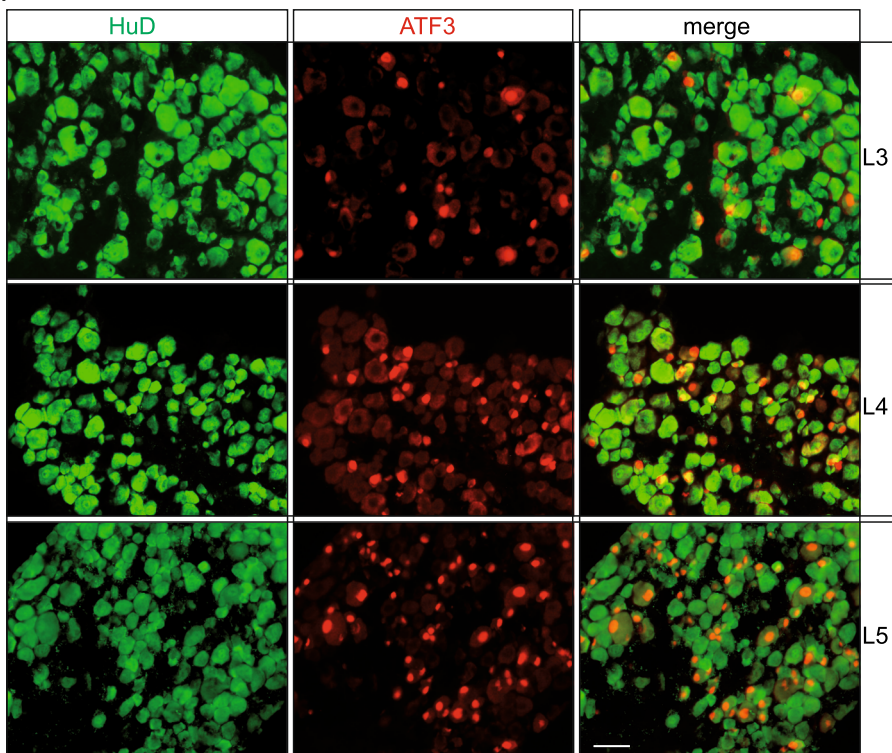

**B**

ATF3 immunoreactivity in DRGs after SNV(cp,t)

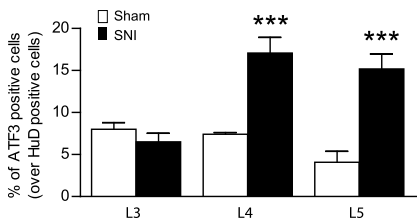

Supplement: MOESM6 [file 9612244]
